# Supplementary material
Source: HighWire-hosted journal article supplement (https://bmjopen.bmj.com/content/14/8/e079866)
Supplement: inline-supplementary-material-1 [file inline-supplementary-material-1.pdf]

**Search Strategy (e.g. MEDLINE, CINAHL, APA Psycinfo)**

Database: EBSCO MEDLINE, Pyshcinfo, CINAHL.

| Search ID# | Search Terms                                                                                                                                                                                                                                                               | Results   |
|------------|----------------------------------------------------------------------------------------------------------------------------------------------------------------------------------------------------------------------------------------------------------------------------|-----------|
| S1         | Domestic Abuse OR Domestic violence OR Domestic assault OR Intimate partner violence OR partner violence OR interpersonal violence OR spouse abuse OR family violence OR sexual violence OR dating violence OR partner abuse                                               | 90,205    |
| S2         | Primary healthcare OR Primary Healthcare Physician OR Physicians, General Practitioners OR Family Physicians OR Healthcare providers OR Patient Focused Care OR General Practice OR Care OR Primary Health OR Health Care Primary OR Primary Care OR Patient Centered Care | 1,396,187 |
| S3         | Kuwait OR Bahrain OR United Arab Emirates OR Oman OR Qatar OR Saudi Arabia OR Lebanon OR Syria OR Palestine OR Israel OR Turkey OR Jordan                                                                                                                                  | 929,659   |
| S4         | Iran OR Iraq OR Yemen OR Morocco OR Libya OR Tunisia OR Algeria OR Egypt OR Malta OR Djibouti OR Ethiopia OR Sudan                                                                                                                                                         | 476,267   |
| S5         | S3 OR S4                                                                                                                                                                                                                                                                   | 1,374,139 |
| S6         | Knowledge OR Understanding OR Ability OR Awareness OR Education OR Expertise OR Familiarity OR Grasp OR Grip OR Insight OR Intelligence OR Judgement                                                                                                                       | 7,457,100 |
| S7         | Observation OR Recognition OR Comprehension OR Command OR Apprehension OR Skill OR Proficiency OR Capacity OR Capability OR Consciousness                                                                                                                                  | 3,348,600 |
| S8         | S6 OR S7                                                                                                                                                                                                                                                                   | 9,630,887 |
| S9         | Attitude OR Approach OR opinion OR Perspective OR Point of view OR Position OR Prejudice OR Stance OR Reaction OR Sensibility OR Stand OR Temperament                                                                                                                      | 7,530,678 |
| S10        | View OR Inclination OR Leaning OR Predilection OR Disposition OR Headset OR Standpoint OR Frame of mind OR Mental state OR Proclivity OR Angle                                                                                                                             | 1,258,559 |
| S11        | Reaction OR Ideas OR Conviction OR Orientation OR Feelings OR Thoughts OR Interpretation                                                                                                                                                                                   | 3,872,651 |
| S12        | S9 OR S10 OR S11                                                                                                                                                                                                                                                           | 9,436,742 |
| S13        | Barriers OR Boundary OR Boundaries OR Limit OR Limitations OR Impediment OR Obstacle OR Fortification OR Hurdle OR Hindrance OR Drawback OR Complication                                                                                                                   | 5,653,834 |
| S14        | Difficulty OR Problem OR Disadvantage                                                                                                                                                                                                                                      | 2,421,074 |
| S15        | S13 OR S14                                                                                                                                                                                                                                                                 | 7,648,623 |
| S16        | S1 AND S2 AND S5 AND S8 AND S12 AND S15                                                                                                                                                                                                                                    | 8         |
